# Supplementary material for: Review of Clinical Evidence over 10 Years on Prevention and Treatment of a Film-Forming Medical Device Containing Photolyase in the Management of Field Cancerization in Actinic Keratosis
Source: PubMed Central journal article supplement — Dermatol Ther (Heidelb). 2019 Apr 9;9(2):259–70. doi: 10.1007/s13555-019-0294-1 (PMC6522584; doi:10.1007/s13555-019-0294-1), 2019-04-09
Supplement: 13555_2019_294_MOESM1_ESM.pdf [file 13555_2019_294_MOESM1_ESM.pdf]

**Puig et al\_Eryfotona Supplementary Table 1.** Summary of the most commonly used treatment approaches for AK in clinical practice.

| Type of treatment                                     | Short description                                                                                                                                                                                                                                                                                                                                                                                               | Type of treated lesions                                                       | Adverse events/disadvantages                                                                                                                                                                                           |
|-------------------------------------------------------|-----------------------------------------------------------------------------------------------------------------------------------------------------------------------------------------------------------------------------------------------------------------------------------------------------------------------------------------------------------------------------------------------------------------|-------------------------------------------------------------------------------|------------------------------------------------------------------------------------------------------------------------------------------------------------------------------------------------------------------------|
| <b>I. Physical treatment methods</b>                  |                                                                                                                                                                                                                                                                                                                                                                                                                 |                                                                               |                                                                                                                                                                                                                        |
| Cryotherapy                                           | Widely used mainly for isolated AK lesions. Represents a destruction of the tissue surface by vaporization of liquid nitrogen on the lesion.                                                                                                                                                                                                                                                                    | Applied on visible lesions, not treating subclinical lesions.                 | The protocol is not standardized, and different outcomes are observed. Can destroy healthy cells, as well. Is associated with pain during and immediately after treatment.                                             |
| Curettage                                             | Physical ablation of lesions with a curette.                                                                                                                                                                                                                                                                                                                                                                    | Isolated, non-suspicious and well-defined AK lesions.                         |                                                                                                                                                                                                                        |
| Surgical excision                                     | Physical ablation of the lesion with a minimum margin. Not a first line treatment.                                                                                                                                                                                                                                                                                                                              | Typically used for suspicious isolated AK lesions that could progress to SCC. |                                                                                                                                                                                                                        |
| PDT                                                   | Based on the application of a photosensitizing substance, leading to a selective destruction of atypical cells.                                                                                                                                                                                                                                                                                                 | Suitable as both lesion- and field-directed therapy.                          | Local burning sensation, pain, crusting or erythema reported by up to 80% of patients. Expensive and time-consuming.                                                                                                   |
| Laser therapies                                       | Ablation with an Er:Yag and CO2 laser ultrapulse.                                                                                                                                                                                                                                                                                                                                                               | Indicated for isolated or small lesions.                                      | Efficiency has not been evaluated in double blind randomized controlled trials. Causes erythema, pain, irritation, oedema.                                                                                             |
| <b>II. Topical treatment methods</b>                  |                                                                                                                                                                                                                                                                                                                                                                                                                 |                                                                               |                                                                                                                                                                                                                        |
| 5-Fluorouracil (5-FU)                                 | 5-FU is a pyrimidine analog which interferes with DNA synthesis and inhibits its replication. Suitable for a field-directed treatment. It is applied once or twice daily for an average period of 3-4 weeks.                                                                                                                                                                                                    | Suitable for both single and multiple lesions.                                | Local side effects such as pain, burning sensation, pruritus and hyperpigmentation. Clearance rate varies from 43% to 96% and appearance of new lesions has been reported in 65% of patients one year after treatment. |
| 3% Diclofenac in 2.5% hyaluronic acid                 | A non-selective cyclooxygenase inhibitor, which inhibits cell proliferation and angiogenesis. Applied twice daily for 2-3 months. A clearance rate of 31% and 47% after 2 and 3 months respectively has been reported. The rate of appearance of new lesions at one year is 21%.                                                                                                                                | Suitable for a field-directed treatment.                                      | Local side effects such as contact eczema, dryness, oedema, pruritus or ulcerations.                                                                                                                                   |
| Ingenol mebutate (available as 150 µg/g and 500 µg/g) | A biological compound that causes cytotoxicity and delayed immunomodulation of innate immunity. The 150 µg/g gel is applied on the face and scalp once daily for 3 days, and the 500 µg/g format is applied on the trunk and extremities once daily for 2 days. Complete clearance observed in up to 42% of cases after a 2-month treatment. Appearance of new lesions has been reported in up to 56% of cases. | Suitable for a field-directed treatment.                                      | Local side effect such as erythema, scaling, crusting or oedema                                                                                                                                                        |
| Imiquimod cream (available as 5% and 3.75% cream)     | An imidazoquinoline-derivative which stimulates the cutaneous innate immunity, applied 3 times per week for 4 weeks (this cycle could be repeated once). A clearance rate of 26.8% and 55% after one and two cycles respectively has been reported. Appearance of new lesions has been reported in up to 39% of cases.                                                                                          | Suitable for a field-directed treatment.                                      | Local side effects such as pruritus, burning, erythema, pain, oedema, dryness, crusting, erosions or ulcerations                                                                                                       |

**Puig et al\_ Eryfotona Supplementary Table 2.** Summary of available clinical studies evaluating the effect of Eryfotona AK-NMSC treatment on AK lesions

| Study                          | Study design                                                    | Arms                                                                                             | Nº of patients                                                                        | Duration   | Main outcomes                                                                                                                                                                                                                                                         |
|--------------------------------|-----------------------------------------------------------------|--------------------------------------------------------------------------------------------------|---------------------------------------------------------------------------------------|------------|-----------------------------------------------------------------------------------------------------------------------------------------------------------------------------------------------------------------------------------------------------------------------|
| Moscarella E, 2017             | Pilot randomised, controlled, double-blind parallel-group study | Eryfotona AK-NMSC vs marketed very high protection sunscreen                                     | 50 overall (36 completed the study)                                                   | 6 months   | Significant reduction in the number of AK lesions after 6 months in both groups (up to 31%). According to a sub-analysis of patients with ≤10 lesions, only 14% of Eryfotona AK-NMSC treated patients presented new lesions (vs 54% of the patients using sunscreen). |
| Eibenschutz L et al., 2016     | Randomised, assessor-blinded parallel-group study               | Eryfotona AK-NMSC after PDT vs Sunscreen after PDT                                               | 30 AK patients who had previously undergone a successful PDT treatment (15 per arm)   | 9 months   | Significant decrease in the number of new lesions in the Eryfotona AK-NMSC group in comparison to the sunscreen group in which there was a progressive increase in AK lesions.                                                                                        |
| Puig A et al., 2014            | Pilot, prospective, controlled interventional clinical study    | Eryfotona AK-NMSC vs sunscreen                                                                   | 12 (with multiple AK lesions) – 9 treated with Eryfotona AK-NMSC and 3 with Sunscreen | 2 months   | Significant improvement in erythema, scaling, pigmentation, thickness of the stratum corneum and degree of atypia in keratinocytes in the Eryfotona AK-NMSC group, as evaluated by clinical and dermoscopic assessment of AK lesions.                                 |
| Puviani M et al., 2015         | Pilot, prospective, open label, 1 arm study                     | Eryfotona AK-NMSC                                                                                | 11 with single or multiple AK lesions                                                 | 3 months   | The number of AK lesions in the CF was reduced by 60% at 1 month and by 75% at 3 months.                                                                                                                                                                              |
| Puviani M et al., 2013         | Case report series                                              | Eryfotona AK-NMSC as single therapy (only in 1 case Eryfotona AK-NMSC was applied after surgery) | 6 with single or multiple lesions                                                     | 1-2 months | >50% reduction in the number of existing lesions in all patients. >75% reduction in the number of existing lesions in half of the cases.                                                                                                                              |
| Navarrete-Dechent et al., 2017 | Prospective, single-arm, case-series                            | Eryfotona AK-NMSC                                                                                | 9 patients with CF/multiple AK                                                        | 3 months   | An overall reduction of 76,6% in the number of AK lesions. The majority of patients had an almost complete resolution of AK lesions.                                                                                                                                  |
| Giustini S et al., 2014        | Case series retrospective analysis                              | Eryfotona AK-NMSC                                                                                | 8 with multiple AK lesions                                                            | 12 months  | 65% decrease in the manifestation of new AK lesions.                                                                                                                                                                                                                  |
| Laino L et al., 2015           | Clinical and thermographic, single arm study                    | Eryfotona AK-NMSC                                                                                | 30 AK patients with CF (27 completed the study)                                       | 9 months   | Reduction in the area hyperthermic halo at 9 months.                                                                                                                                                                                                                  |
| Puig-Butillé JA et al., 2013   | 1 arm study                                                     | Eryfotona AK-NMSC                                                                                | 7 AK patients with CF                                                                 |            | Skin improvement in all patients confirmed by histopathological and molecular analysis. Complete histological clearance in 3/7 patients; >80% histological clearance in 1 patient, partial histological clearance in 3 patients.                                      |
| Arroyo-Rstom et al., 2014      | Observational longitudinal study                                | Eryfotona AK-NMSC                                                                                | 14 patients with single lesions (17 lesion evaluated)                                 | 4 months   | Out of the 17 lesions, 13 were Grade I, the rest were Grade II. After a 4-month treatment, Grade I lesions presented less desquamation and an improvement of the epidermis pattern, while Grade II lesions showed no changes.                                         |
| Vaño-Galvan S et al., 2014     | Observational study                                             | Eryfotona AK-NMSC in conjunction with cryotherapy                                                | 41 patients with at least 4 lesions                                                   | 6 months   | Decrease in the number of existing lesions at 6 months (9,56 mean lesion number at baseline and 1,51 at 6 months). A very small number of new lesions: 0,27 lesions at the end of the first month and 0,76 at the end of the study.                                   |
